# Supplementary material for: The use of main-group elements to mimic catalytic behavior of transition metals I: reduction of dinitrogen to ammonia catalyzed by bis(Lewis base)borylenium diradicals
Source: Royal Society of Chemistry journal article supplement (doi:10.1039/d0cp04933f), 2020-01-01
Supplement: d0cp04933f1.pdf [file d0cp04933f1.pdf]

## Supporting Information

### The Use of Main-Group Elements to Mimic Catalytic Behavior of Transition Metals I: Reduction of Dinitrogen to Ammonia Catalyzed by Bis(Lewis Base)Borylenes

Yu Wang<sup>‡</sup> and Chun-Guang Liu<sup>\*†</sup>

*<sup>†</sup>Department of Chemistry, Faculty of Science, Beihua University, Jilin City,  
132013, P. R. China.*

*<sup>‡</sup>College of Chemical Engineering, Northeast Electric Power University, Jilin  
City, 132012, P. R. China*

**Table S1.** Molecular Orbital Energies (in eV), HOMO-LUMO Gap (in eV), and Singlet–triplet Energy Splitting ( $\Delta E_{ST}$ , in kcal mol<sup>-1</sup>) Computed at the B3LYP/6-311+G\*\* Level of Theory for Borylene Molecules B–R

| R                  | HOMO(eV) | LUMO(eV) | LUMO+1(eV) | Gap <sub>H-L</sub> (eV) | $\Delta E_{ST}$ (kcal/mol) |
|--------------------|----------|----------|------------|-------------------------|----------------------------|
| F                  | -7.74    | -1.16    | -1.16      | 6.58                    | 78.75                      |
| Cl                 | -7.34    | -2.12    | -2.12      | 5.22                    | 53.59                      |
| Br                 | -7.24    | -2.29    | -2.29      | 4.94                    | 49.44                      |
| Me <sub>3</sub> Si | -5.19    | -2.36    | -2.36      | 2.82                    | 8.25                       |

**Table S2.** The FMO energies of the three bis(Lewis base) borylene in their triplet ground state have been calculated by using DFT-B3LYP functional with 6-311G\*\* basis

| SOL     | HOMO(eV) |         | LUMO(eV) |         | LUMO+1(eV) |         | Gap <sub>H-L</sub> (eV) |         | $\Delta E$ (kcal/mol) |
|---------|----------|---------|----------|---------|------------|---------|-------------------------|---------|-----------------------|
|         | $\alpha$ | $\beta$ | $\alpha$ | $\beta$ | $\alpha$   | $\beta$ | $\alpha$                | $\beta$ |                       |
| C-B-C   | -5.78    | -5.80   | -3.37    | -3.69   | -0.81      | -2.89   | 2.41                    | 2.11    | 13.50                 |
| Si-B-Si | -5.80    | -7.15   | -1.53    | -3.11   | -1.39      | -2.63   | 4.27                    | 4.03    | 12.70                 |
| P-B-P   | -6.01    | -7.45   | -1.92    | -3.16   | -1.71      | -3.01   | 4.08                    | 4.29    | 4.60                  |
| Gas     | HOMO(eV) |         | LUMO(eV) |         | LUMO+1(eV) |         | Gap <sub>H-L</sub> (eV) |         | $\Delta E$ (kcal/mol) |
|         | $\alpha$ | $\beta$ | $\alpha$ | $\beta$ | $\alpha$   | $\beta$ | $\alpha$                | $\beta$ |                       |
| C-B-C   | -8.22    | -8.02   | -6.57    | -6.95   | -3.62      | -6.24   | 1.65                    | 1.07    | 9.20                  |
| Si-B-Si | -7.96    | -9.43   | -3.84    | -5.29   | -3.68      | -4.67   | 4.12                    | 4.14    | 13.23                 |
| P-B-P   | -8.62    | -9.85   | -4.39    | -5.70   | -4.16      | -5.60   | 4.23                    | 4.16    | 8.38                  |

**Table S3.** The NPA on the charge transfer the B center, N<sub>2</sub>, and the bis(Lewis base)borylene ligand L in the bis(Lewis base)borylene-dinitrogen compounds studied here.

| Parameters | $n_{\pi(B \rightarrow N_2)}$ | $n_{\pi(N_2 \rightarrow B)}$ | $n_{\sigma(N_2 \rightarrow B)}$ | $n_{N_2, excess}$ | $n_B$ | $n_{formal}$ | $n_{B, excess}$ | $n_L$ |
|------------|------------------------------|------------------------------|---------------------------------|-------------------|-------|--------------|-----------------|-------|
| <b>2</b>   | 0.444                        | 0.074                        | 0.426                           | -0.056            | 4.031 | 2            | 2.031           | 1.975 |
| <b>3</b>   | 0.519                        | 0.091                        | 0.420                           | 0.008             | 3.536 | 2            | 1.536           | 1.544 |

The Yoshizawa's equation was employed to further describe the electron transfer among the B center, the N<sub>2</sub> moiety, and the bis(Lewis base) ligands (L). The number of electrons ( $n_L$ ) transferred from L to B center can be calculated by eq. 1:

$$n_L = n_{B, \text{excess}} + n_{N_2, \text{excess}} \quad (1)$$

where  $n_{B, \text{excess}}$  and  $n_{N_2, \text{excess}}$  are defined by

$$n_{B, \text{excess}} = n_B - n_{B, \text{formal}} \quad (2)$$

$$n_{N_2, \text{excess}} = n_{\pi(B \rightarrow N_2)} - n_{\pi(N_2 \rightarrow B)} - n_{\sigma(N_2 \rightarrow B)} \quad (3)$$

As shown in eq. 2,  $n_B$  is defined as the number of valence electrons of the B center, and  $n_{\text{formal}}$  is the number of valence electrons of the B center with the formal charge. The excess electrons of the B center ( $n_{B, \text{excess}}$ ) are thus expressed by the value of  $n_B - n_{B, \text{formal}}$ . As mentioned above, the number of electrons on the bonding  $N_2$  moiety is determined by  $\pi(B \rightarrow N_2)$ ,  $\pi(N_2 \rightarrow B)$ , and  $\sigma(N_2 \rightarrow B)$  electron transfer processes in the series of bis(Lewis base)borylene-dinitrogen compounds studied here. The number of electrons transferred of these processes was defined as  $n_{\pi(B \rightarrow N_2)}$ ,  $n_{\pi(N_2 \rightarrow B)}$ , and  $n_{\sigma(N_2 \rightarrow B)}$  in eq. 3, respectively. And thus the excess electrons of the  $N_2$  moiety ( $n_{N_2, \text{excess}}$ ) can be roughly estimated by using the value of  $n_{\pi(B \rightarrow N_2)} - n_{\pi(N_2 \rightarrow B)} - n_{\sigma(N_2 \rightarrow B)}$ .

**Table S4.** The calculated adsorption energy  $\Delta G$  value of reaction intermediates ( $\Delta G$ , in kcal mol<sup>-1</sup>)

|         | $\Delta G(*N_2H)$ | $\Delta G(*NH_2)$ | $\Delta G(*NH_3)$ |
|---------|-------------------|-------------------|-------------------|
| C-B-C   | -67.73            | -123.35           | -46.26            |
| Si-B-Si | -53.28            | -96.15            | -37.90            |
| P-B-P   | -57.43            | -95.62            | -35.29            |

**Table S5.** The calculated valence shell atomic orbitals population of B atoms

|         | $2p_x$ | $2p_y$ | $2p_z$ |
|---------|--------|--------|--------|
| C-B-C   | 0.321  | 0.099  | 0.603  |
| Si-B-Si | 1.056  | 0.711  | 0.861  |
| P-B-P   | 0.738  | 0.804  | 0.778  |

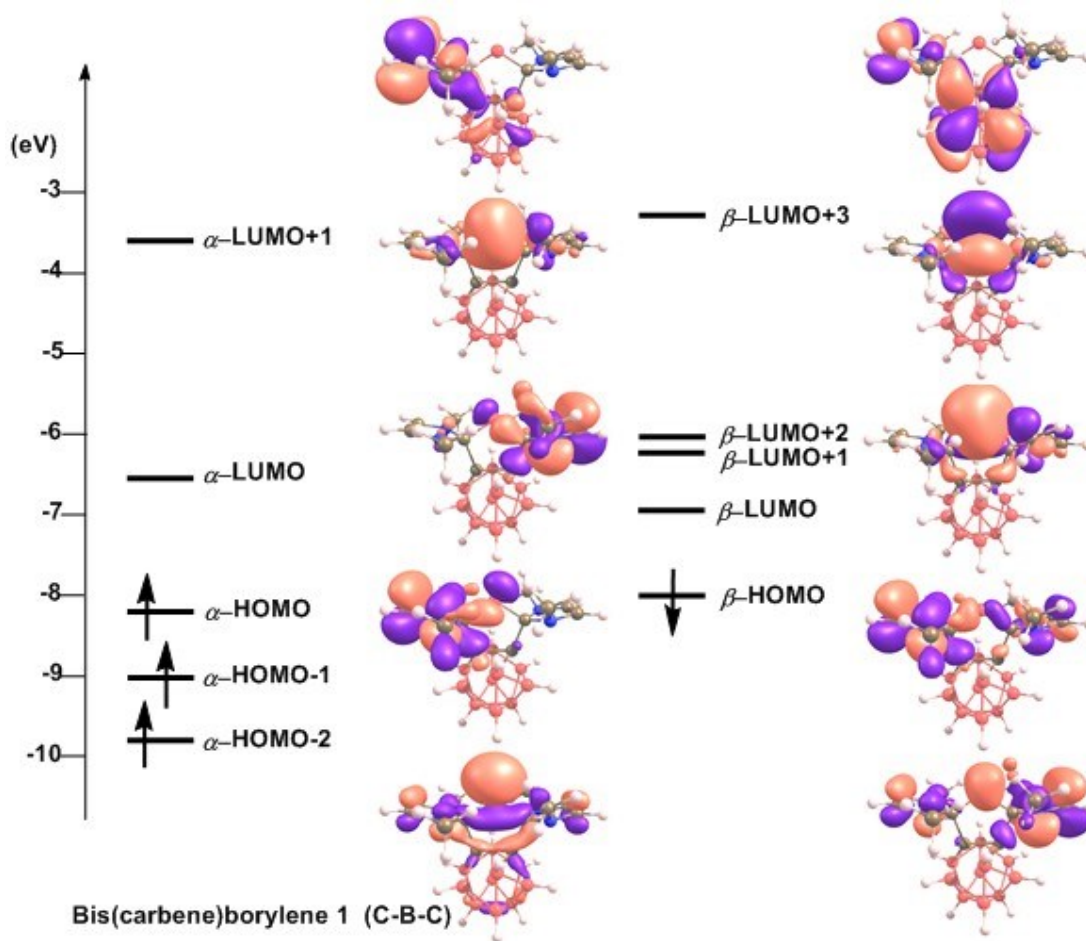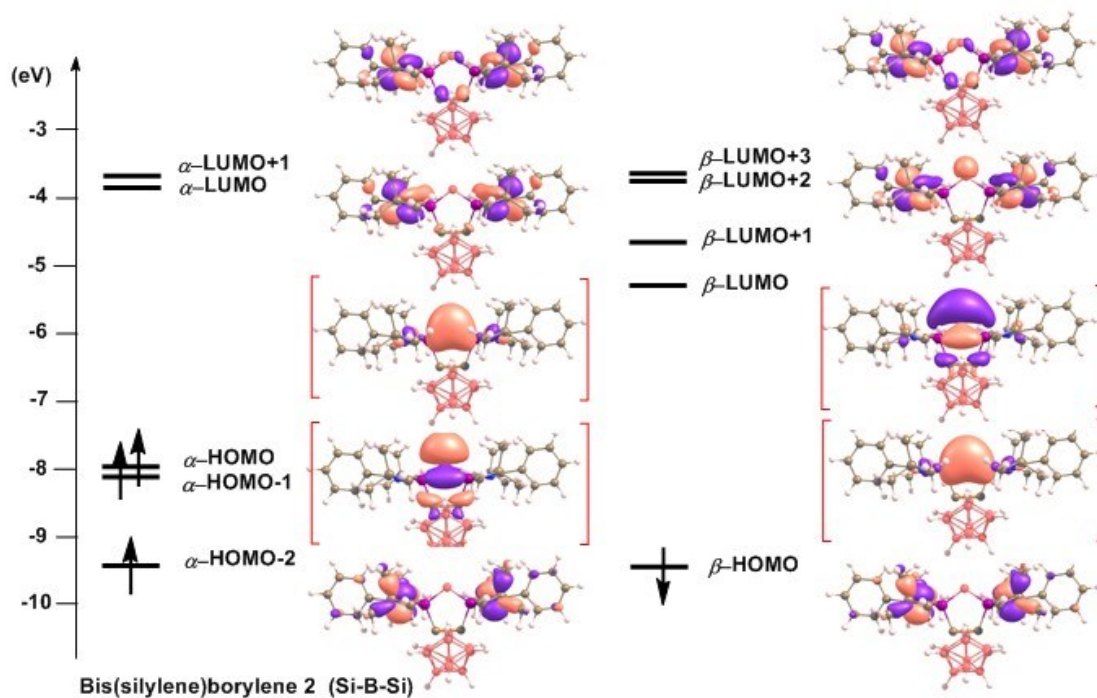

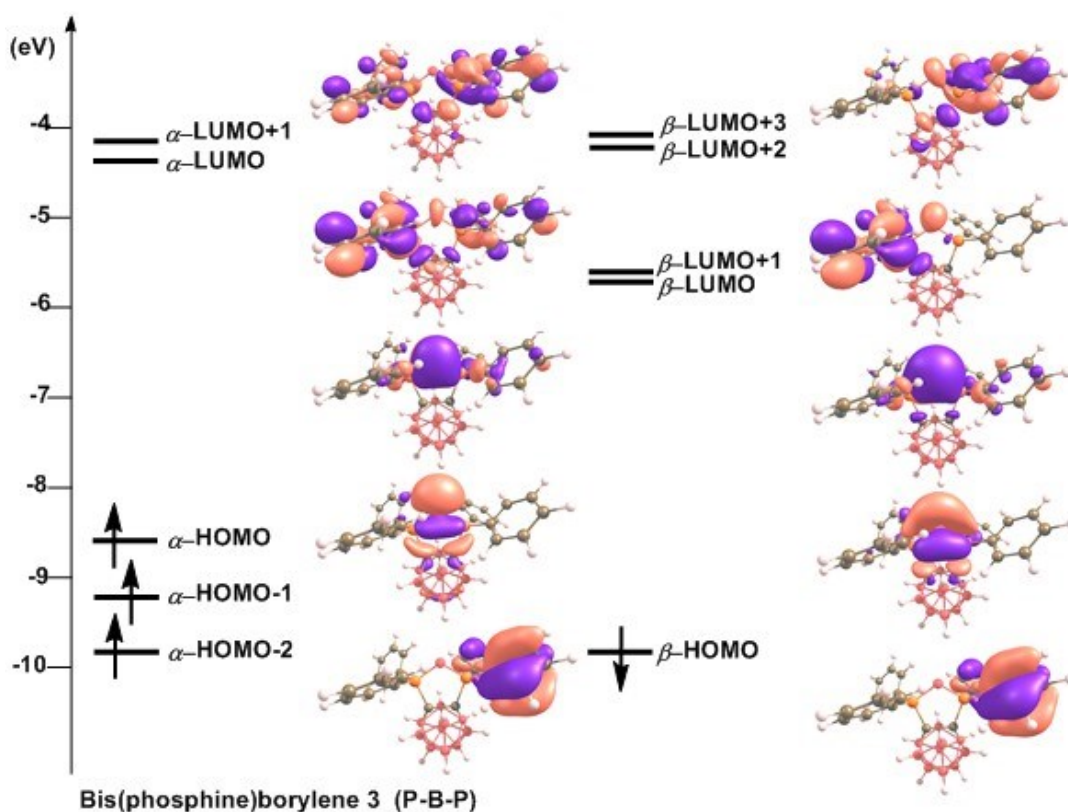

**Figure S1.** Frontier molecular orbitals of the *o*-carborane-based bis(Lewis base) borylene, **1**, **2**, and **3**, in triplet ground state, highlighting the two nearly degenerate SOMOs

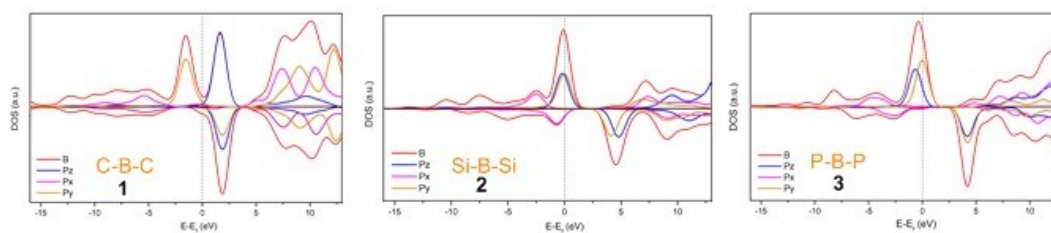

**Figure S2.** Projected electronic densities of states (PDOS) for boron orbitals of bis(Lewis base) borylene, **1**, **2**, and **3**, in triplet ground state. The top represents the alpha orbital, and the bottom represents the beta orbital.

# Xyz coordinates

1

| Atomic | Coordinates (Angstroms) |             |             |
|--------|-------------------------|-------------|-------------|
|        | X                       | Y           | Z           |
| C      | -0.73089100             | 0.95263600  | -0.04622000 |
| C      | 0.91185900              | 0.79112800  | -0.03507000 |
| B      | 0.13508600              | 1.27216000  | -1.49250900 |
| H      | 0.06744800              | 0.49390500  | -2.36385500 |
| B      | -1.22186600             | 2.29193300  | -1.00025600 |
| H      | -2.23517300             | 2.19526200  | -1.60365900 |
| B      | -1.22098100             | 2.37720500  | 0.77140200  |
| H      | -2.23598400             | 2.33562000  | 1.37972600  |
| B      | 0.13361100              | 1.40812500  | 1.36414700  |
| H      | 0.05521800              | 0.70717500  | 2.29793200  |
| B      | 1.66053900              | 2.00843100  | -0.98033300 |
| H      | 2.64316700              | 1.71101600  | -1.57074400 |
| B      | 0.30927700              | 3.00767000  | -1.59167400 |
| H      | 0.36891300              | 3.52831700  | -2.65504200 |
| B      | -0.52861100             | 3.70999200  | -0.17829200 |
| H      | -1.07427800             | 4.76087400  | -0.23085600 |
| B      | 0.30528000              | 3.14786800  | 1.29958700  |
| H      | 0.36025700              | 3.76672100  | 2.30932400  |
| B      | 1.66011400              | 2.09436200  | 0.79132000  |
| H      | 2.64452600              | 1.85938600  | 1.40663600  |
| B      | 1.25042600              | 3.53538300  | -0.16642900 |
| H      | 1.99218400              | 4.45885900  | -0.20943300 |
| B      | -0.14490700             | -1.46774600 | 0.08817700  |
| N      | 2.23005300              | -1.15333400 | -1.07407100 |
| N      | 2.18165900              | -1.05547900 | 1.18762000  |
| C      | 1.31737100              | -0.74832100 | 0.01505300  |
| C      | 3.45263700              | -1.49357400 | -0.58730600 |
| C      | 3.41339100              | -1.47030200 | 0.77943100  |
| H      | 4.17658200              | -1.76171800 | 1.48531100  |
| H      | 4.26655500              | -1.77418500 | -1.23953700 |
| N      | -2.34816200             | -0.70956100 | -1.09808000 |
| N      | -2.41339800             | -0.53921300 | 1.17148700  |
| C      | -1.43516300             | -0.47506100 | 0.06568500  |
| C      | -3.64218500             | -0.79954100 | -0.66471000 |
| C      | -3.68271300             | -0.64873800 | 0.69170700  |
| H      | -4.54053900             | -0.63924900 | 1.34849500  |
| H      | -4.45372400             | -1.00255400 | -1.34763500 |
| C      | -2.01174700             | -1.31113700 | -2.39326000 |

|   |             |             |             |
|---|-------------|-------------|-------------|
| H | -1.09502300 | -0.89448000 | -2.79411100 |
| H | -1.92292900 | -2.40268800 | -2.32123100 |
| H | -2.82359000 | -1.07152200 | -3.08447400 |
| C | -2.09013900 | -0.76189900 | 2.56695600  |
| H | -1.25657300 | -1.47488700 | 2.62152900  |
| H | -1.81075300 | 0.15585500  | 3.08969400  |
| H | -2.96127700 | -1.19969600 | 3.06001900  |
| C | 1.82949800  | -1.44784200 | -2.43719000 |
| H | 1.76258300  | -0.55083100 | -3.05787600 |
| H | 2.56348500  | -2.12772300 | -2.87536000 |
| H | 0.85221500  | -1.94410100 | -2.41728400 |
| C | 1.85795900  | -1.04173800 | 2.61465800  |
| H | 2.46460400  | -1.80711000 | 3.10556200  |
| H | 2.07959100  | -0.06879600 | 3.06210400  |
| H | 0.81094600  | -1.28867000 | 2.77335100  |
| N | -0.29205300 | -2.86127100 | 0.06213200  |
| N | -0.43346000 | -3.99048000 | 0.02052900  |

## 2

| Atomic | Coordinates (Angstroms) |             |             |
|--------|-------------------------|-------------|-------------|
|        | X                       | Y           | Z           |
| Si     | 1.56209200              | 0.00008600  | -0.15218400 |
| Si     | -1.56201900             | 0.00001200  | -0.15244400 |
| N      | 3.05340000              | -1.08432800 | -0.31931000 |
| N      | 3.05346400              | 1.08459300  | -0.31755000 |
| N      | -3.05330600             | -1.08441600 | -0.31956400 |
| N      | -3.05337400             | 1.08450200  | -0.31789600 |
| C      | 0.85134200              | -0.00108300 | 1.63251500  |
| C      | -0.85152300             | -0.00112200 | 1.63237400  |
| C      | 3.36937400              | -2.53044600 | -0.57219400 |
| C      | 3.65231300              | -2.73726800 | -2.07322000 |
| H      | 4.55471300              | -2.21044600 | -2.39270100 |
| H      | 3.80223800              | -3.80291500 | -2.27609400 |
| H      | 2.80868000              | -2.39317100 | -2.68198600 |
| C      | 4.55590900              | -3.01122800 | 0.28311200  |
| H      | 5.50403600              | -2.56958800 | -0.02677500 |
| H      | 4.39058700              | -2.78528200 | 1.34174000  |
| H      | 4.64661600              | -4.09767300 | 0.18109400  |
| C      | 2.12989200              | -3.34756100 | -0.18415600 |
| H      | 1.24094500              | -3.01048800 | -0.72746500 |
| H      | 2.30005300              | -4.39804400 | -0.43851300 |
| H      | 1.93554500              | -3.28949600 | 0.88920800  |
| C      | 3.84669000              | 0.00019000  | -0.43886700 |

|   |             |             |             |
|---|-------------|-------------|-------------|
| C | 5.32607800  | 0.00033000  | -0.61199200 |
| C | 5.91674100  | 0.00121200  | -1.88332600 |
| H | 5.29782500  | 0.00178700  | -2.77512800 |
| C | 7.30778400  | 0.00137600  | -2.00362800 |
| H | 7.75983700  | 0.00209200  | -2.99078000 |
| C | 8.11155700  | 0.00062500  | -0.86243700 |
| H | 9.19299500  | 0.00075900  | -0.95973500 |
| C | 7.52381100  | -0.00028500 | 0.40535600  |
| H | 8.14504800  | -0.00088700 | 1.29583900  |
| C | 6.13577600  | -0.00041900 | 0.53459000  |
| H | 5.68027900  | -0.00112200 | 1.52025400  |
| C | 3.36937500  | 2.53098900  | -0.56899900 |
| C | 4.55649300  | 3.01069500  | 0.28609800  |
| H | 4.64711200  | 4.09727000  | 0.18539400  |
| H | 4.39188400  | 2.78340400  | 1.34454900  |
| H | 5.50443200  | 2.56947600  | -0.02496500 |
| C | 3.65131300  | 2.73956700  | -2.06997500 |
| H | 3.80148300  | 3.80541100  | -2.27162200 |
| H | 4.55328000  | 2.21281300  | -2.39079000 |
| H | 2.80709600  | 2.39656900  | -2.67855200 |
| C | 2.13024900  | 3.34782800  | -0.17921100 |
| H | 2.30047700  | 4.39858300  | -0.43239900 |
| H | 1.24094000  | 3.01160900  | -0.72245100 |
| H | 1.93647400  | 3.28849800  | 0.89418700  |
| C | -3.36931100 | -2.53054800 | -0.57245200 |
| C | -3.65223500 | -2.73736000 | -2.07348400 |
| H | -3.80214700 | -3.80300400 | -2.27638200 |
| H | -4.55464500 | -2.21054400 | -2.39295700 |
| H | -2.80860400 | -2.39325300 | -2.68222700 |
| C | -2.12984800 | -3.34769700 | -0.18440800 |
| H | -2.29994700 | -4.39815400 | -0.43890100 |
| H | -1.24085200 | -3.01053600 | -0.72757600 |
| H | -1.93562200 | -3.28975300 | 0.88897700  |
| C | -4.55587500 | -3.01130300 | 0.28283100  |
| H | -4.64661200 | -4.09775000 | 0.18083400  |
| H | -4.39057300 | -2.78534600 | 1.34145100  |
| H | -5.50398400 | -2.56963700 | -0.02709000 |
| C | -3.84661300 | 0.00008700  | -0.43909600 |
| C | -5.32602800 | 0.00026000  | -0.61202900 |
| C | -5.91686700 | 0.00117700  | -1.88328400 |
| H | -5.29807600 | 0.00172100  | -2.77517400 |
| C | -7.30793000 | 0.00147800  | -2.00339300 |
| H | -7.76012100 | 0.00225200  | -2.99048400 |
| C | -8.11154400 | 0.00086200  | -0.86209000 |



|   |             |             |             |
|---|-------------|-------------|-------------|
| H | -9.19299600 | 0.00113900  | -0.95923300 |
| C | -7.52362000 | -0.00006300 | 0.40561900  |
| H | -8.14473400 | -0.00053600 | 1.29618800  |
| C | -6.13556500 | -0.00037100 | 0.53466200  |
| H | -5.67992700 | -0.00104600 | 1.52026000  |
| C | -3.36930600 | 2.53087800  | -0.56940700 |
| C | -2.13015400 | 3.34776100  | -0.17978100 |
| H | -2.30045600 | 4.39850900  | -0.43294800 |
| H | -1.93624200 | 3.28843800  | 0.89359000  |
| H | -1.24089700 | 3.01158900  | -0.72313500 |
| C | -3.65135900 | 2.73934900  | -2.07038000 |
| H | -4.55338400 | 2.21262000  | -2.39107300 |
| H | -3.80148200 | 3.80518300  | -2.27210100 |
| H | -2.80721400 | 2.39625000  | -2.67900200 |
| C | -4.55636200 | 3.01065500  | 0.28573900  |
| H | -5.50433900 | 2.56945400  | -0.02523800 |
| H | -4.39169900 | 2.78340500  | 1.34419100  |
| H | -4.64695200 | 4.09722700  | 0.18499400  |
| B | -0.00008900 | -1.42521600 | 2.08623600  |
| H | -0.00002200 | -2.33712000 | 1.34542100  |
| B | 1.44281300  | -0.88659600 | 2.97148700  |
| H | 2.44767600  | -1.49749400 | 2.82030700  |
| B | 1.44277500  | 0.88300400  | 2.97248200  |
| H | 2.44762500  | 1.49407700  | 2.82200600  |
| B | -0.00014600 | 1.42245900  | 2.08779500  |
| H | -0.00008700 | 2.33506400  | 1.34784500  |
| B | -1.44312900 | -0.88663800 | 2.97127000  |
| H | -2.44795400 | -1.49758900 | 2.82000600  |
| B | -0.00021600 | -1.44988300 | 3.85082400  |
| H | -0.00025500 | -2.48788000 | 4.42575100  |
| B | 0.88997100  | -0.00258200 | 4.41149900  |
| H | 1.53698500  | -0.00312500 | 5.40611200  |
| B | -0.00026800 | 1.44525600  | 3.85240000  |
| H | -0.00033300 | 2.48266400  | 4.42838700  |
| B | -1.44316800 | 0.88294900  | 2.97227100  |
| H | -2.44802300 | 1.49398100  | 2.82163600  |
| B | -0.89052900 | -0.00261300 | 4.41136600  |
| H | -1.53771200 | -0.00317800 | 5.40587100  |
| B | 0.00012300  | 0.00093100  | -1.25093900 |
| N | 0.00027400  | 0.00242300  | -2.66258700 |
| N | 0.00039600  | 0.00366500  | -3.79049200 |

## 3

| Atomic | Coordinates (Angstroms) |             |             |
|--------|-------------------------|-------------|-------------|
|        | X                       | Y           | Z           |
| P      | 1.59291900              | -0.05263300 | -0.38711200 |
| P      | -1.58280800             | -0.04909700 | -0.30269600 |
| B      | 0.02026700              | 1.43370300  | 1.81252500  |
| H      | -0.01822100             | 2.31248100  | 1.02538700  |
| B      | -1.38619600             | 0.85146100  | 2.74628000  |
| H      | -2.40997800             | 1.42426800  | 2.60901900  |
| B      | -1.33208800             | -0.92833100 | 2.77898200  |
| H      | -2.32030100             | -1.56703500 | 2.65779700  |
| B      | 0.11736100              | -1.44474600 | 1.87271400  |
| H      | 0.15501300              | -2.35803900 | 1.13011300  |
| B      | 1.56014900              | -0.83421200 | 2.71444300  |
| H      | 2.57782600              | -1.41114700 | 2.53548000  |
| B      | 1.49248200              | 0.94221300  | 2.68471100  |
| H      | 2.46329700              | 1.59030100  | 2.51671500  |
| B      | 0.05467700              | 1.47321300  | 3.57997500  |
| H      | 0.03451400              | 2.51808100  | 4.13883900  |
| B      | -0.77370700             | 0.00509200  | 4.18358000  |
| H      | -1.40143700             | 0.00471700  | 5.18897400  |
| B      | 0.15116600              | -1.42623100 | 3.63325000  |
| H      | 0.19636700              | -2.45186400 | 4.22561100  |
| B      | 1.00237400              | 0.06162800  | 4.14539000  |
| H      | 1.67392000              | 0.10424300  | 5.12121000  |
| C      | -0.79595500             | -0.04575700 | 1.42159000  |
| C      | 0.89852700              | 0.00764700  | 1.37972800  |
| C      | 2.54350400              | 1.48440800  | -0.70926800 |
| C      | 3.63185200              | 1.90215000  | 0.07875500  |
| H      | 3.92811200              | 1.34610700  | 0.96039700  |
| C      | 4.33867900              | 3.05395500  | -0.26335700 |
| H      | 5.17142000              | 3.37404600  | 0.35542100  |
| C      | 3.97865600              | 3.79196800  | -1.39395500 |
| H      | 4.53425900              | 4.68717900  | -1.65671300 |
| C      | 2.90654700              | 3.37759100  | -2.18500200 |
| H      | 2.62629500              | 3.94461100  | -3.06754400 |
| C      | 2.18825700              | 2.23098300  | -1.84432200 |
| H      | 1.35398200              | 1.91463400  | -2.46316900 |
| C      | 2.71954300              | -1.48618600 | -0.58489700 |
| C      | 2.15861200              | -2.74161100 | -0.88216900 |
| H      | 1.08391000              | -2.84860900 | -0.98448200 |
| C      | 2.98249000              | -3.85107800 | -1.06265900 |
| H      | 2.54081100              | -4.81517800 | -1.29535800 |

|   |             |             |             |
|---|-------------|-------------|-------------|
| C | 4.36843400  | -3.71995000 | -0.95379200 |
| H | 5.00882900  | -4.58505700 | -1.09758000 |
| C | 4.93177400  | -2.47307000 | -0.67515000 |
| H | 6.00966500  | -2.36382800 | -0.60499100 |
| C | 4.11607600  | -1.35677200 | -0.49614800 |
| H | 4.57550600  | -0.39410500 | -0.30995000 |
| C | -2.81299900 | -1.39180500 | -0.54257200 |
| C | -2.62137100 | -2.69129800 | -0.04148400 |
| H | -1.77693400 | -2.92382000 | 0.59319100  |
| C | -3.53069200 | -3.70016100 | -0.35196800 |
| H | -3.38315400 | -4.69549200 | 0.05595100  |
| C | -4.62251700 | -3.43533300 | -1.18246300 |
| H | -5.32573700 | -4.22645400 | -1.42480000 |
| C | -4.80460300 | -2.15435300 | -1.70321800 |
| H | -5.64586200 | -1.94255900 | -2.35606500 |
| C | -3.90936600 | -1.13215200 | -1.38522800 |
| H | -4.07070400 | -0.14178500 | -1.79514700 |
| C | -2.51433400 | 1.52093900  | -0.46406400 |
| C | -3.74250400 | 1.70496700  | 0.19761300  |
| H | -4.16485200 | 0.91414200  | 0.80948200  |
| C | -4.42911700 | 2.90943100  | 0.06072300  |
| H | -5.37502700 | 3.04984900  | 0.57485500  |
| C | -3.90378000 | 3.93070300  | -0.73707600 |
| H | -4.44498200 | 4.86616600  | -0.84355400 |
| C | -2.68868300 | 3.74917200  | -1.39939500 |
| H | -2.28300500 | 4.53981200  | -2.02317100 |
| C | -1.99242400 | 2.54739900  | -1.26413500 |
| H | -1.04669200 | 2.40467500  | -1.77788200 |
| B | -0.02195400 | -0.23874800 | -1.33012900 |
| N | -0.06777900 | -0.69881900 | -2.65729500 |
| N | -0.10490600 | -1.07408200 | -3.72213900 |
